# Supplementary material for: Early-life exposures and age at thelarche in the Sister Study cohort
Source: Springer Nature journal article supplement (doi:10.1186/s13058-021-01490-z), 2021-12-11

**Figure S1.** Distribution of age at thelarche in the analytic sample

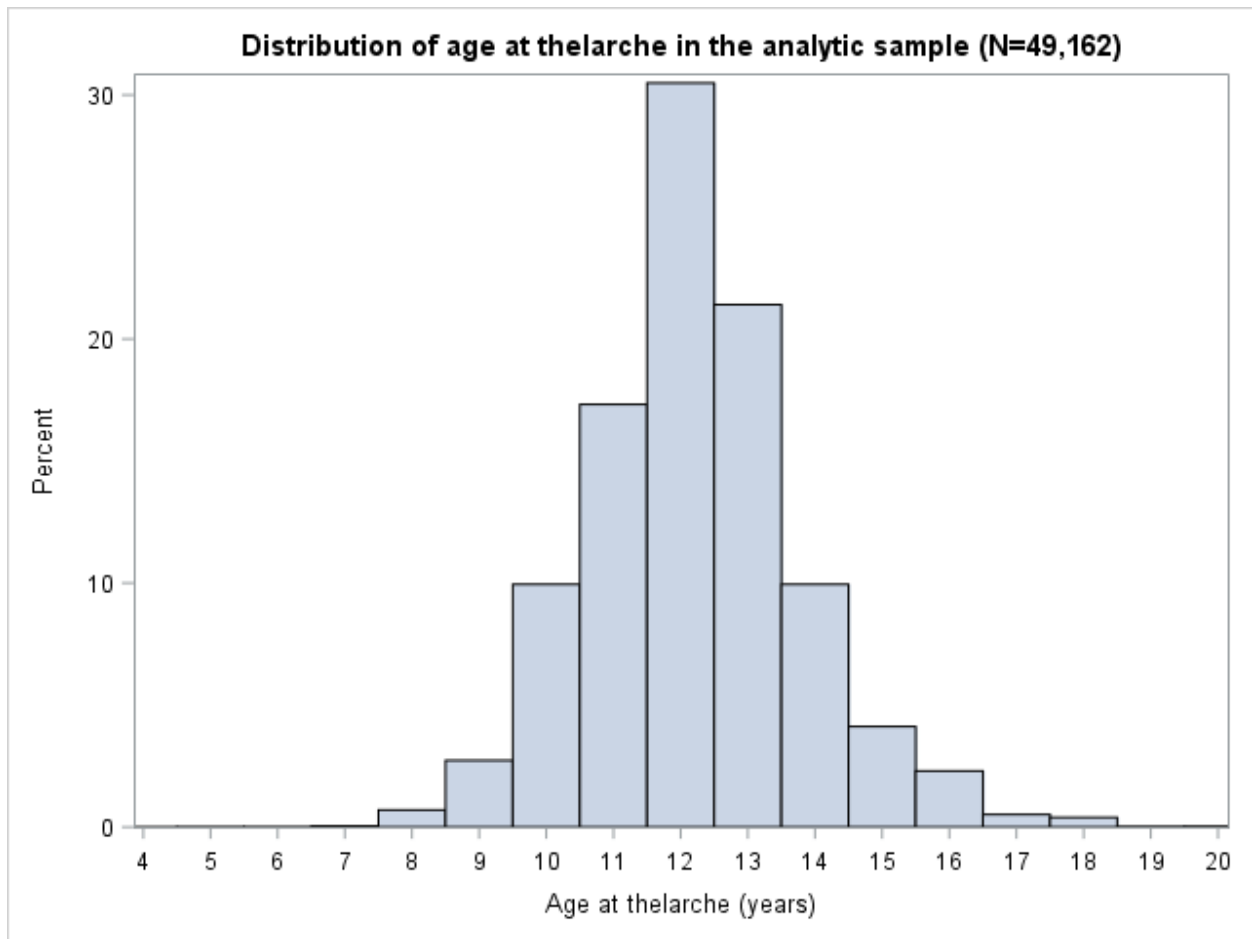

Supplement: MOESM1 [file 19950916]
