# Supplementary material for: Early-life exposures and age at thelarche in the Sister Study cohort
Source: Springer Nature journal article supplement (doi:10.1186/s13058-021-01490-z), 2021-12-11

**Figure S3.** Directed acyclic graph of hypothesized associations between early-life exposures and age at thelarche

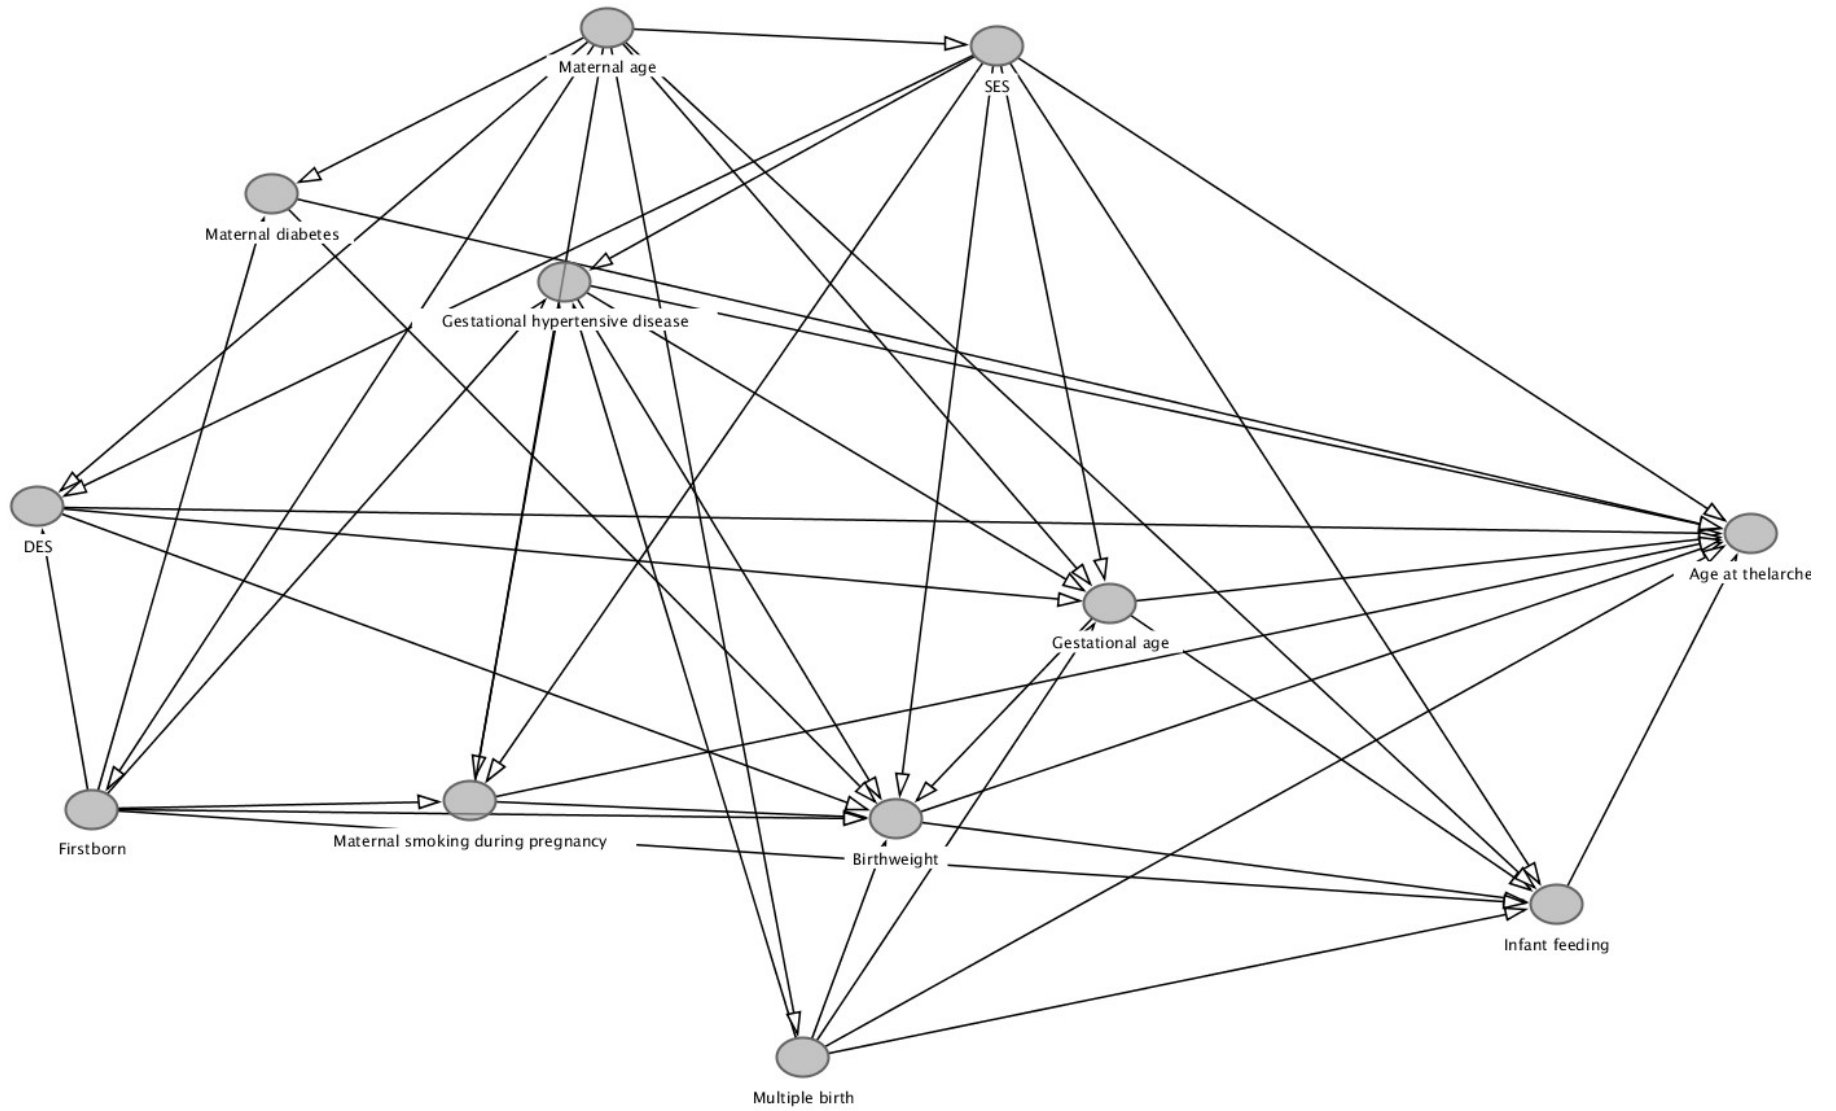

Supplement: MOESM3 [file 19950916]
