# Supplementary material for: Early-life exposures and age at thelarche in the Sister Study cohort
Source: Springer Nature journal article supplement (doi:10.1186/s13058-021-01490-z), 2021-12-11
Supplement: MOESM4 [file 19950916]

**Table S1.** Associations between early-life exposures and timing of thelarche in the Sister Study cohort additionally adjusted for relative weight at age 10 (N=49,033)<sup>a</sup>

|                                           | Early thelarche<br>(≤10 years) <sup>b,c</sup> |            | Late thelarche<br>(≥14 years) <sup>b,c</sup> |            |
|-------------------------------------------|-----------------------------------------------|------------|----------------------------------------------|------------|
|                                           | OR                                            | 95% CI     | OR                                           | 95% CI     |
| <i>Maternal pregnancy characteristics</i> |                                               |            |                                              |            |
| Diabetes                                  |                                               |            |                                              |            |
| Any                                       | 1.18                                          | 0.91, 1.52 | 0.90                                         | 0.70, 1.17 |
| <i>Gestational diabetes</i>               | 0.81                                          | 0.53, 1.24 | 0.86                                         | 0.59, 1.25 |
| <i>Pre-pregnancy diabetes</i>             | 1.65                                          | 1.18, 2.30 | 0.87                                         | 0.59, 1.28 |
| None                                      | 1                                             | Ref        | 1                                            | Ref        |
| Gestational hypertensive disorder         |                                               |            |                                              |            |
| Any                                       | 1.23                                          | 1.07, 1.41 | 0.95                                         | 0.83, 1.09 |
| <i>Pre-eclampsia</i>                      | 1.33                                          | 1.11, 1.61 | 0.96                                         | 0.80, 1.16 |
| <i>Gestational hypertension</i>           | 1.08                                          | 0.86, 1.35 | 0.81                                         | 0.64, 1.02 |
| None                                      | 1                                             | Ref        | 1                                            | Ref        |
| DES use                                   |                                               |            |                                              |            |
| Yes                                       | 1.24                                          | 1.05, 1.47 | 0.99                                         | 0.84, 1.17 |
| No                                        | 1                                             | Ref        | 1                                            | Ref        |
| Smoking during pregnancy                  |                                               |            |                                              |            |
| Yes                                       | 1.16                                          | 1.10, 1.23 | 1.04                                         | 0.98, 1.10 |
| No                                        | 1                                             | Ref        | 1                                            | Ref        |
| Farm exposure                             |                                               |            |                                              |            |
| Work and residence                        | 1.00                                          | 0.92, 1.09 | 0.96                                         | 0.89, 1.04 |
| Work only                                 | 1.04                                          | 0.82, 1.32 | 1.21                                         | 0.99, 1.49 |
| Residence only                            | 0.99                                          | 0.87, 1.14 | 0.85                                         | 0.75, 0.96 |
| None                                      | 1                                             | Ref        | 1                                            | Ref        |
| Age at delivery                           |                                               |            |                                              |            |
| <20 years                                 | 1.37                                          | 1.21, 1.55 | 0.89                                         | 0.79, 1.01 |
| 20-24 years                               | 1.11                                          | 1.03, 1.20 | 0.96                                         | 0.90, 1.03 |
| 25-29 years                               | 1                                             | Ref        | 1                                            | Ref        |
| 30-34 years                               | 0.93                                          | 0.86, 1.00 | 0.95                                         | 0.89, 1.02 |
| 35-39 years                               | 0.96                                          | 0.88, 1.05 | 0.95                                         | 0.88, 1.03 |
| ≥40 years                                 | 0.92                                          | 0.81, 1.05 | 1.00                                         | 0.89, 1.13 |
| <i>Birth and infancy characteristics</i>  |                                               |            |                                              |            |
| Firstborn                                 |                                               |            |                                              |            |
| Yes                                       | 1.27                                          | 1.19, 1.35 | 0.84                                         | 0.79, 0.89 |
| No                                        | 1                                             | Ref        | 1                                            | Ref        |
| Birthweight                               |                                               |            |                                              |            |
| <2500g                                    | 1.16                                          | 1.05, 1.28 | 1.03                                         | 0.94, 1.13 |
| 2500g-3999g                               | 1                                             | Ref        | 1                                            | Ref        |

|                                   |      |            |      |            |
|-----------------------------------|------|------------|------|------------|
| ≥4000g                            | 0.90 | 0.81, 1.00 | 1.09 | 0.99, 1.21 |
| Multiple birth                    |      |            |      |            |
| Yes                               | 0.92 | 0.79, 1.09 | 1.08 | 0.94, 1.23 |
| No                                | 1    | Ref        | 1    | Ref        |
| Gestational age at birth          |      |            |      |            |
| Born ≥1 month before due date     | 0.92 | 0.75, 1.12 | 1.09 | 0.92, 1.29 |
| Born 2-4 weeks before due date    | 1.06 | 0.92, 1.21 | 0.92 | 0.81, 1.05 |
| Not born ≥2 weeks before due date | 1    | Ref        | 1    | Ref        |
| Ever breastfed                    |      |            |      |            |
| Yes                               | 1.00 | 0.94, 1.06 | 0.95 | 0.90, 1.00 |
| No                                | 1    | Ref        | 1    | Ref        |
| Ever fed soy formula              |      |            |      |            |
| Yes                               | 1.10 | 0.93, 1.30 | 1.06 | 0.91, 1.24 |
| No                                | 1    | Ref        | 1    | Ref        |

<sup>a</sup>129 women with missing data on weight at age 10 were excluded from this analysis.

<sup>b</sup>Adjusted for birth cohort, race/ethnicity, childhood family income and relative weight at age 10.

<sup>c</sup>Referent group is the larche at 11-13 years
