# Supplementary material for: Early-life exposures and age at thelarche in the Sister Study cohort
Source: Springer Nature journal article supplement (doi:10.1186/s13058-021-01490-z), 2021-12-11
Supplement: MOESM5 [file 19950916]

**Table S2.** Associations between early-life exposures and timing of thelarche in the Sister Study cohort by relative weight at age 10 (N=49,033)<sup>a</sup>

|                                           | Lighter<br>(n=17,217)               |            |                                    |            | Same<br>(n=22,910)                  |            |                                    |            | Heavier<br>(n=8906)                 |            |                                    |            | p-<br>het <sup>d</sup> |
|-------------------------------------------|-------------------------------------|------------|------------------------------------|------------|-------------------------------------|------------|------------------------------------|------------|-------------------------------------|------------|------------------------------------|------------|------------------------|
|                                           | Early<br>(≤10 years) <sup>b,c</sup> |            | Late<br>(≥14 years) <sup>b,c</sup> |            | Early<br>(≤10 years) <sup>b,c</sup> |            | Late<br>(≥14 years) <sup>b,c</sup> |            | Early<br>(≤10 years) <sup>b,c</sup> |            | Late<br>(≥14 years) <sup>b,c</sup> |            |                        |
|                                           | OR                                  | 95% CI     | OR                                 | 95% CI     | OR                                  | 95% CI     | OR                                 | 95% CI     | OR                                  | 95% CI     | OR                                 | 95% CI     |                        |
| <i>Maternal pregnancy characteristics</i> |                                     |            |                                    |            |                                     |            |                                    |            |                                     |            |                                    |            |                        |
| <b>Diabetes</b>                           |                                     |            |                                    |            |                                     |            |                                    |            |                                     |            |                                    |            | 0.45                   |
| Any                                       | 1.34                                | 0.80, 1.22 | 0.88                               | 0.60, 1.27 | 0.93                                | 0.61, 1.42 | 1.02                               | 0.69, 1.51 | 1.39                                | 0.89, 2.17 | 0.60                               | 0.21, 1.65 |                        |
| None                                      | 1                                   | Ref        | 1                                  | Ref        | 1                                   | Ref        | 1                                  | Ref        | 1                                   | Ref        | 1                                  | Ref        |                        |
| <b>Gestational hypertensive disorder</b>  |                                     |            |                                    |            |                                     |            |                                    |            |                                     |            |                                    |            | 0.32                   |
| Any                                       | 1.32                                | 1.00, 1.74 | 0.98                               | 0.81, 1.18 | 1.19                                | 0.96, 1.46 | 0.83                               | 0.65, 1.04 | 1.24                                | 0.97, 1.57 | 1.35                               | 0.91, 1.98 |                        |
| None                                      | 1                                   | Ref        | 1                                  | Ref        | 1                                   | Ref        | 1                                  | Ref        | 1                                   | Ref        | 1                                  | Ref        |                        |
| <b>DES use</b>                            |                                     |            |                                    |            |                                     |            |                                    |            |                                     |            |                                    |            | 0.69                   |
| Yes                                       | 1.18                                | 0.82, 1.69 | 0.89                               | 0.71, 1.13 | 1.25                                | 0.97, 1.60 | 1.05                               | 0.81, 1.36 | 1.32                                | 0.98, 1.78 | 1.32                               | 0.81, 2.16 |                        |
| No                                        | 1                                   | Ref        | 1                                  | Ref        | 1                                   | Ref        | 1                                  | Ref        | 1                                   | Ref        | 1                                  | Ref        |                        |
| <b>Smoking during pregnancy</b>           |                                     |            |                                    |            |                                     |            |                                    |            |                                     |            |                                    |            | 0.78                   |
| Yes                                       | 1.20                                | 1.06, 1.36 | 1.05                               | 0.97, 1.13 | 1.17                                | 1.08, 1.28 | 1.05                               | 0.97, 1.15 | 1.11                                | 1.00, 1.23 | 0.95                               | 0.80, 1.14 |                        |
| No                                        | 1                                   | Ref        | 1                                  | Ref        | 1                                   | Ref        | 1                                  | Ref        | 1                                   | Ref        | 1                                  | Ref        |                        |
| <b>Farm exposure</b>                      |                                     |            |                                    |            |                                     |            |                                    |            |                                     |            |                                    |            | 0.50                   |
| Work and residence                        | 1.00                                | 0.83, 1.21 | 0.98                               | 0.88, 1.10 | 0.94                                | 0.83, 1.07 | 0.90                               | 0.80, 1.02 | 1.11                                | 0.95, 1.31 | 1.18                               | 0.91, 1.53 |                        |
| Work only                                 | 0.85                                | 0.51, 1.44 | 1.16                               | 0.87, 1.55 | 1.21                                | 0.86, 1.71 | 1.28                               | 0.93, 1.77 | 0.96                                | 0.63, 1.46 | 1.21                               | 0.64, 2.29 |                        |
| Residence only                            | 1.03                                | 0.78, 1.36 | 0.79                               | 0.66, 0.95 | 0.87                                | 0.71, 1.08 | 0.89                               | 0.73, 1.09 | 1.17                                | 0.92, 1.49 | 1.01                               | 0.66, 1.54 |                        |
| None                                      | 1                                   | Ref        | 1                                  | Ref        | 1                                   | Ref        | 1                                  | Ref        | 1                                   | Ref        | 1                                  | Ref        |                        |
| <b>Age at delivery</b>                    |                                     |            |                                    |            |                                     |            |                                    |            |                                     |            |                                    |            | 0.70                   |
| <20 years                                 | 1.54                                | 1.22, 1.95 | 0.94                               | 0.79, 1.11 | 1.37                                | 1.14, 1.64 | 0.87                               | 0.72, 1.06 | 1.19                                | 0.93, 1.52 | 0.77                               | 0.48, 1.23 |                        |
| 20-24 years                               | 1.02                                | 0.87, 1.20 | 0.95                               | 0.87, 1.05 | 1.14                                | 1.03, 1.27 | 0.98                               | 0.88, 1.08 | 1.14                                | 1.00, 1.30 | 0.90                               | 0.72, 1.14 |                        |
| 25-29 years                               | 1                                   | Ref        | 1                                  | Ref        | 1                                   | Ref        | 1                                  | Ref        | 1                                   | Ref        | 1                                  | Ref        |                        |
| 30-34 years                               | 0.90                                | 0.76, 1.07 | 0.97                               | 0.88, 1.07 | 0.96                                | 0.86, 1.08 | 0.92                               | 0.82, 1.02 | 0.90                                | 0.79, 1.03 | 1.02                               | 0.82, 1.26 |                        |
| 35-39 years                               | 1.04                                | 0.86, 1.27 | 0.95                               | 0.85, 1.07 | 0.95                                | 0.83, 1.09 | 0.98                               | 0.87, 1.11 | 0.92                                | 0.79, 1.03 | 0.88                               | 0.68, 1.15 |                        |
| ≥40 years                                 | 1.14                                | 0.87, 1.49 | 1.04                               | 0.88, 1.22 | 0.92                                | 0.75, 1.12 | 0.95                               | 0.79, 1.14 | 0.81                                | 0.64, 1.02 | 1.13                               | 0.80, 1.59 |                        |
| <i>Birth and infancy characteristics</i>  |                                     |            |                                    |            |                                     |            |                                    |            |                                     |            |                                    |            |                        |
| <b>Firstborn</b>                          |                                     |            |                                    |            |                                     |            |                                    |            |                                     |            |                                    |            | 0.65                   |
| Yes                                       | 1.25                                | 1.09, 1.43 | 0.88                               | 0.80, 0.95 | 1.27                                | 1.16, 1.40 | 0.80                               | 0.73, 0.89 | 1.27                                | 1.13, 1.42 | 0.77                               | 0.62, 0.96 |                        |

|                                   |      |            |      |            |      |            |      |            |      |            |      |            |      |
|-----------------------------------|------|------------|------|------------|------|------------|------|------------|------|------------|------|------------|------|
| No                                | 1    | Ref        | 1    | Ref        | 1    | Ref        | 1    | Ref        | 1    | Ref        | 1    | Ref        |      |
| Birthweight                       |      |            |      |            |      |            |      |            |      |            |      |            | 0.99 |
| <2500g                            | 1.18 | 0.98, 1.41 | 1.02 | 0.91, 1.15 | 1.17 | 1.01, 1.37 | 1.06 | 0.90, 1.24 | 1.11 | 0.91, 1.35 | 1.04 | 0.73, 1.48 |      |
| 2500g-3999g                       | 1    | Ref        | 1    | Ref        | 1    | Ref        | 1    | Ref        | 1    | Ref        | 1    | Ref        |      |
| ≥4000g                            | 0.81 | 0.60, 1.08 | 1.10 | 0.94, 1.29 | 0.96 | 0.82, 1.13 | 1.09 | 0.94, 1.26 | 0.87 | 0.73, 1.04 | 1.09 | 0.83, 1.44 |      |
| Multiple birth                    |      |            |      |            |      |            |      |            |      |            |      |            | 0.92 |
| Yes                               | 1.00 | 0.72, 1.37 | 1.07 | 0.89, 1.29 | 0.85 | 0.67, 1.09 | 1.07 | 0.87, 1.32 | 1.00 | 0.73, 1.36 | 1.17 | 0.72, 1.90 |      |
| No                                | 1    | Ref        | 1    | Ref        | 1    | Ref        | 1    | Ref        | 1    | Ref        | 1    | Ref        |      |
| Gestational age at birth          |      |            |      |            |      |            |      |            |      |            |      |            | 0.16 |
| Born ≥1 month before due date     | 0.75 | 0.50, 1.14 | 0.98 | 0.78, 1.23 | 1.02 | 0.74, 1.40 | 1.37 | 1.04, 1.81 | 0.95 | 0.68, 1.32 | 0.89 | 0.49, 1.60 |      |
| Born 2-4 weeks before due date    | 1.30 | 0.98, 1.72 | 1.01 | 0.84, 1.22 | 0.96 | 0.77, 1.18 | 0.78 | 0.62, 0.97 | 1.06 | 0.83, 1.35 | 1.13 | 0.76, 1.69 |      |
| Not born ≥2 weeks before due date | 1    | Ref        | 1    | Ref        | 1    | Ref        | 1    | Ref        | 1    | Ref        | 1    | Ref        |      |
| Ever breastfed                    |      |            |      |            |      |            |      |            |      |            |      |            | 0.06 |
| Yes                               | 1.03 | 0.91, 1.17 | 0.9  | 0.83, 0.97 | 1.04 | 0.95, 1.13 | 0.98 | 0.91, 1.07 | 0.93 | 0.84, 1.03 | 1.09 | 0.91, 1.29 |      |
| No                                | 1    | Ref        | 1    | Ref        | 1    | Ref        | 1    | Ref        | 1    | Ref        | 1    | Ref        |      |
| Ever fed soy formula              |      |            |      |            |      |            |      |            |      |            |      |            | 0.76 |
| Yes                               | 1.10 | 0.76, 1.57 | 1.09 | 0.87, 1.35 | 1.17 | 0.92, 1.50 | 0.99 | 0.77, 1.28 | 0.99 | 0.73, 1.33 | 1.24 | 0.78, 1.96 |      |
| No                                | 1    | Ref        | 1    | Ref        | 1    | Ref        | 1    | Ref        | 1    | Ref        | 1    | Ref        |      |

<sup>a</sup>129 women with missing data on weight at age 10 were excluded from this analysis.

<sup>b</sup>Adjusted for birth cohort, race/ethnicity, and childhood family income

<sup>c</sup>Referent group is the larche at 11-13 years

<sup>d</sup>P for heterogeneity calculated from a likelihood ratio test of nested models
