# Supplementary material for: Early-life exposures and age at thelarche in the Sister Study cohort
Source: Springer Nature journal article supplement (doi:10.1186/s13058-021-01490-z), 2021-12-11
Supplement: MOESM6 [file 19950916]

|                                   |      |            |      |            |      |            |      |            |      |            |      |            |      |            |      |            |  |  |      |
|-----------------------------------|------|------------|------|------------|------|------------|------|------------|------|------------|------|------------|------|------------|------|------------|--|--|------|
| Birthweight                       |      |            |      |            |      |            |      |            |      |            |      |            |      |            |      |            |  |  | 0.60 |
| <2500g                            | 1.02 | 0.72, 1.44 | 1.07 | 0.81, 1.41 | 1.04 | 0.88, 1.24 | 1.24 | 1.06, 1.46 | 1.08 | 0.92, 1.26 | 0.92 | 0.77, 1.10 | 1.06 | 0.84, 1.32 | 1.17 | 0.95, 1.44 |  |  |      |
| 2500g-3999g                       | 1    | Ref        | 1    | Ref        | 1    | Ref        | 1    | Ref        | 1    | Ref        | 1    | Ref        | 1    | Ref        | 1    | Ref        |  |  |      |
| ≥4000g                            | 1.27 | 0.94, 1.71 | 0.94 | 0.72, 1.23 | 0.96 | 0.79, 1.16 | 1.12 | 0.94, 1.33 | 1.09 | 0.94, 1.26 | 0.98 | 0.83, 1.15 | 1.08 | 0.86, 1.35 | 0.85 | 0.68, 1.07 |  |  |      |
| Multiple birth                    |      |            |      |            |      |            |      |            |      |            |      |            |      |            |      |            |  |  | 0.09 |
| Yes                               | 0.44 | 0.22, 0.87 | 1.04 | 0.72, 1.50 | 1.02 | 0.78, 1.33 | 0.93 | 0.73, 1.20 | 0.84 | 0.64, 1.11 | 1.30 | 1.06, 1.61 | 0.91 | 0.65, 1.27 | 1.10 | 0.82, 1.47 |  |  |      |
| No                                | 1    | Ref        | 1    | Ref        | 1    | Ref        | 1    | Ref        | 1    | Ref        | 1    | Ref        | 1    | Ref        | 1    | Ref        |  |  |      |
| Gestational age at birth          |      |            |      |            |      |            |      |            |      |            |      |            |      |            |      |            |  |  | 0.43 |
| Born ≥1 month before due date     | 1.37 | 0.71, 2.62 | 0.96 | 0.51, 1.80 | 0.72 | 0.49, 1.07 | 0.96 | 0.69, 1.34 | 0.87 | 0.64, 1.18 | 1.26 | 0.98, 1.61 | 1.13 | 0.77, 1.66 | 1.34 | 0.95, 1.90 |  |  |      |
| Born 2-4 weeks before due date    | 1.22 | 0.70, 2.11 | 0.61 | 0.33, 1.11 | 1.07 | 0.82, 1.40 | 1.07 | 0.83, 1.38 | 1.09 | 0.89, 1.34 | 0.85 | 0.69, 1.04 | 0.97 | 0.74, 1.26 | 1.01 | 0.79, 1.28 |  |  |      |
| Not born ≥2 weeks before due date | 1    | Ref        | 1    | Ref        | 1    | Ref        | 1    | Ref        | 1    | Ref        | 1    | Ref        | 1    | Ref        | 1    | Ref        |  |  |      |
| Ever breastfed                    |      |            |      |            |      |            |      |            |      |            |      |            |      |            |      |            |  |  | 0.52 |
| Yes                               | 0.90 | 0.73, 1.10 | 0.93 | 0.79, 1.10 | 1.01 | 0.91, 1.11 | 0.93 | 0.85, 1.02 | 1.00 | 0.92, 1.10 | 0.91 | 0.83, 0.99 | 0.98 | 0.86, 1.11 | 1.04 | 0.93, 1.17 |  |  |      |
| No                                | 1    | Ref        | 1    | Ref        | 1    | Ref        | 1    | Ref        | 1    | Ref        | 1    | Ref        | 1    | Ref        | 1    | Ref        |  |  |      |
| Ever fed soy formula              |      |            |      |            |      |            |      |            |      |            |      |            |      |            |      |            |  |  | 0.12 |
| Yes                               | 0.28 | 0.04, 2.10 | 1.08 | 0.44, 2.65 | 1.01 | 0.67, 1.51 | 0.73 | 0.47, 1.11 | 0.98 | 0.75, 1.27 | 1.16 | 0.93, 1.45 | 1.34 | 1.03, 1.74 | 1.15 | 0.89, 1.48 |  |  |      |
| No                                | 1    | Ref        | 1    | Ref        | 1    | Ref        | 1    | Ref        | 1    | Ref        | 1    | Ref        | 1    | Ref        | 1    | Ref        |  |  |      |

<sup>a</sup>Adjusted for race/ethnicity and childhood family income

<sup>b</sup>Referent group is thelarche at age 11-13 years

<sup>c</sup>P for heterogeneity calculated from a likelihood ratio test of nested models

<sup>d</sup>Birth cohort 1928-1939 was excluded from DES analysis due to low prevalence of exposure.
