# Supplementary material for: Early-life exposures and age at thelarche in the Sister Study cohort
Source: Springer Nature journal article supplement (doi:10.1186/s13058-021-01490-z), 2021-12-11
Supplement: MOESM7 [file 19950916]

**Table S4.** Associations between early-life exposures and timing of thelarche in the Sister Study cohort by race/ethnicity (N=47,883)<sup>a</sup>

|                                           | Non-Hispanic White<br>(n=41,431)    |            |                                    |            | Non-Hispanic African-American/Black<br>(n=4106) |            |                                    |            | Hispanic/Latina<br>(n=2346)         |            |                                    |            | p-<br>het <sup>d</sup> |
|-------------------------------------------|-------------------------------------|------------|------------------------------------|------------|-------------------------------------------------|------------|------------------------------------|------------|-------------------------------------|------------|------------------------------------|------------|------------------------|
|                                           | Early<br>(≤10 years) <sup>b,c</sup> |            | Late<br>(≥14 years) <sup>b,c</sup> |            | Early<br>(≤10 years) <sup>b,c</sup>             |            | Late<br>(≥14 years) <sup>b,c</sup> |            | Early<br>(≤10 years) <sup>b,c</sup> |            | Late<br>(≥14 years) <sup>b,c</sup> |            |                        |
|                                           | OR                                  | 95% CI     | OR                                 | 95% CI     | OR                                              | 95% CI     | OR                                 | 95% CI     | OR                                  | 95% CI     | OR                                 | 95% CI     |                        |
| <i>Maternal pregnancy characteristics</i> |                                     |            |                                    |            |                                                 |            |                                    |            |                                     |            |                                    |            |                        |
| Diabetes                                  |                                     |            |                                    |            |                                                 |            |                                    |            |                                     |            |                                    |            | 0.51                   |
| Any                                       | 1.08                                | 0.79, 1.48 | 0.88                               | 0.65, 1.20 | 1.81                                            | 1.03, 3.15 | 1.19                               | 0.64, 2.21 | 1.41                                | 0.65, 3.07 | 0.65                               | 0.22, 1.88 |                        |
| None                                      | 1                                   | Ref        | 1                                  | Ref        | 1                                               | Ref        | 1                                  | Ref        | 1                                   | Ref        | 1                                  | Ref        |                        |
| Gestational hypertensive disorder         |                                     |            |                                    |            |                                                 |            |                                    |            |                                     |            |                                    |            | 0.81                   |
| Any                                       | 1.24                                | 1.07, 1.45 | 0.96                               | 0.83, 1.12 | 1.17                                            | 0.82, 1.67 | 0.76                               | 0.51, 1.14 | 1.20                                | 0.70, 2.05 | 1.12                               | 0.63, 1.98 |                        |
| None                                      | 1                                   | Ref        | 1                                  | Ref        | 1                                               | Ref        | 1                                  | Ref        | 1                                   | Ref        | 1                                  | Ref        |                        |
| DES use                                   |                                     |            |                                    |            |                                                 |            |                                    |            |                                     |            |                                    |            | 0.37                   |
| Yes                                       | 1.26                                | 1.06, 1.50 | 1.08                               | 0.91, 1.27 | 1.22                                            | 0.61, 2.47 | 0.61                               | 0.25, 1.48 | 0.65                                | 0.22, 1.89 | 0.54                               | 0.16, 1.81 |                        |
| No                                        | 1                                   | Ref        | 1                                  | Ref        | 1                                               | Ref        | 1                                  | Ref        | 1                                   | Ref        | 1                                  | Ref        |                        |
| Smoking during pregnancy                  |                                     |            |                                    |            |                                                 |            |                                    |            |                                     |            |                                    |            | 0.60                   |
| Yes                                       | 1.20                                | 1.13, 1.28 | 1.02                               | 0.97, 1.08 | 1.13                                            | 0.93, 1.38 | 1.13                               | 0.93, 1.37 | 1.35                                | 1.03, 1.78 | 1.17                               | 0.88, 1.56 |                        |
| No                                        | 1                                   | Ref        | 1                                  | Ref        | 1                                               | Ref        | 1                                  | Ref        | 1                                   | Ref        | 1                                  | Ref        |                        |
| Farm exposure                             |                                     |            |                                    |            |                                                 |            |                                    |            |                                     |            |                                    |            | 0.42                   |
| Work and residence                        | 1.00                                | 0.91, 1.10 | 0.92                               | 0.84, 1.00 | 1.10                                            | 0.87, 1.39 | 1.04                               | 0.84, 1.31 | 0.81                                | 0.57, 3.26 | 1.12                               | 0.81, 1.55 |                        |
| Work only                                 | 1.07                                | 0.81, 1.42 | 1.21                               | 0.96, 1.53 | 0.91                                            | 0.52, 1.59 | 1.27                               | 0.79, 2.06 | 1.55                                | 0.67, 3.59 | 1.28                               | 0.51, 3.26 |                        |
| Residence only                            | 1.02                                | 0.88, 1.18 | 0.86                               | 0.75, 0.98 | 0.53                                            | 0.29, 0.98 | 0.78                               | 0.47, 1.29 | 0.73                                | 0.42, 1.27 | 1.00                               | 0.60, 1.66 |                        |
| None                                      | 1                                   | Ref        | 1                                  | Ref        | 1                                               | Ref        | 1                                  | Ref        | 1                                   | Ref        | 1                                  | Ref        |                        |
| Age at delivery                           |                                     |            |                                    |            |                                                 |            |                                    |            |                                     |            |                                    |            | 0.96                   |
| <20 years                                 | 1.36                                | 1.18, 1.57 | 0.93                               | 0.81, 1.07 | 1.16                                            | 0.86, 1.57 | 1.09                               | 0.82, 1.45 | 1.07                                | 0.68, 1.67 | 0.76                               | 0.46, 1.27 |                        |
| 20-24 years                               | 1.10                                | 1.02, 1.20 | 0.96                               | 0.89, 1.03 | 1.08                                            | 0.85, 1.37 | 1.06                               | 0.85, 1.33 | 0.84                                | 0.62, 1.15 | 0.95                               | 0.69, 1.29 |                        |
| 25-29 years                               | 1                                   | Ref        | 1                                  | Ref        | 1                                               | Ref        | 1                                  | Ref        | 1                                   | Ref        | 1                                  | Ref        |                        |
| 30-34 years                               | 0.95                                | 0.88, 1.03 | 0.95                               | 0.89, 1.02 | 1.03                                            | 0.80, 1.32 | 0.92                               | 0.72, 1.17 | 0.82                                | 0.59, 1.13 | 0.99                               | 0.71, 1.37 |                        |
| 35-39 years                               | 0.98                                | 0.89, 1.08 | 0.93                               | 0.85, 1.01 | 0.99                                            | 0.74, 1.31 | 0.98                               | 0.75, 1.28 | 0.96                                | 0.67, 1.38 | 0.97                               | 0.67, 1.42 |                        |
| ≥40 years                                 | 0.96                                | 0.83, 1.15 | 1.01                               | 0.89, 1.15 | 0.92                                            | 0.63, 1.36 | 0.90                               | 0.62, 1.31 | 0.88                                | 0.55, 1.42 | 0.88                               | 0.54, 1.45 |                        |
| <i>Birth and infancy characteristics</i>  |                                     |            |                                    |            |                                                 |            |                                    |            |                                     |            |                                    |            |                        |
| Firstborn                                 |                                     |            |                                    |            |                                                 |            |                                    |            |                                     |            |                                    |            | 0.16                   |
| Yes                                       | 1.28                                | 1.19, 1.37 | 0.84                               | 0.79, 0.90 | 1.04                                            | 0.83, 1.31 | 0.88                               | 0.70, 1.10 | 0.96                                | 0.71, 1.30 | 0.75                               | 0.54, 1.04 |                        |
| No                                        | 1                                   | Ref        | 1                                  | Ref        | 1                                               | Ref        | 1                                  | Ref        | 1                                   | Ref        | 1                                  | Ref        |                        |
| Birthweight                               |                                     |            |                                    |            |                                                 |            |                                    |            |                                     |            |                                    |            | 0.06                   |
| <2500g                                    | 1.05                                | 0.94, 1.18 | 1.13                               | 1.02, 1.25 | 0.84                                            | 0.62, 1.13 | 1.19                               | 0.91, 1.55 | 1.84                                | 1.25, 2.70 | 1.14                               | 0.73, 1.80 |                        |
| 2500g-3999g                               | 1                                   | Ref        | 1                                  | Ref        | 1                                               | Ref        | 1                                  | Ref        | 1                                   | Ref        | 1                                  | Ref        |                        |
| ≥4000g                                    | 0.97                                | 0.86, 1.09 | 0.97                               | 0.87, 1.07 | 1.19                                            | 0.81, 1.75 | 1.20                               | 0.81, 1.75 | 1.52                                | 0.95, 2.42 | 1.26                               | 0.77, 2.08 |                        |
| Multiple birth                            |                                     |            |                                    |            |                                                 |            |                                    |            |                                     |            |                                    |            | 0.21                   |

|                                   |      |            |      |            |      |            |      |            |      |            |      |            |      |
|-----------------------------------|------|------------|------|------------|------|------------|------|------------|------|------------|------|------------|------|
| Yes                               | 0.80 | 0.66, 0.96 | 1.08 | 0.94, 1.25 | 1.38 | 0.91, 2.09 | 1.27 | 0.84, 1.92 | 1.12 | 0.56, 2.23 | 1.10 | 0.54, 2.24 |      |
| No                                | 1    | Ref        | 1    | Ref        | 1    | Ref        | 1    | Ref        | 1    | Ref        | 1    | Ref        |      |
| Gestational age at birth          |      |            |      |            |      |            |      |            |      |            |      |            | 0.05 |
| Born ≥1 month before due date     | 0.91 | 0.73, 1.13 | 1.15 | 0.96, 1.37 | 0.74 | 0.42, 1.32 | 0.77 | 0.44, 1.38 | 1.77 | 0.75, 4.21 | 2.93 | 1.35, 6.33 |      |
| Born 2-4 weeks before due date    | 1.08 | 0.94, 1.25 | 0.94 | 0.82, 1.07 | 0.50 | 0.25, 1.00 | 0.64 | 0.33, 1.26 | 2.08 | 0.90, 4.79 | 1.31 | 0.47, 3.64 |      |
| Not born ≥2 weeks before due date | 1    | Ref        | 1    | Ref        | 1    | Ref        | 1    | Ref        | 1    | Ref        | 1    | Ref        |      |
| Ever breastfed                    |      |            |      |            |      |            |      |            |      |            |      |            | 0.51 |
| Yes                               | 0.99 | 0.93, 1.05 | 0.96 | 0.91, 1.01 | 0.92 | 0.77, 1.11 | 0.81 | 0.68, 0.97 | 1.01 | 0.78, 1.31 | 0.88 | 0.68, 1.15 |      |
| No                                | 1    | Ref        | 1    | Ref        | 1    | Ref        | 1    | Ref        | 1    | Ref        | 1    | Ref        |      |
| Ever fed soy formula              |      |            |      |            |      |            |      |            |      |            |      |            | 0.37 |
| Yes                               | 1.04 | 0.86, 1.26 | 1.04 | 0.87, 1.23 | 1.63 | 1.02, 2.60 | 1.35 | 0.83, 2.21 | 0.97 | 0.49, 1.91 | 1.41 | 0.75, 2.63 |      |
| No                                | 1    | Ref        | 1    | Ref        | 1    | Ref        | 1    | Ref        | 1    | Ref        | 1    | Ref        |      |

<sup>a</sup>Women with other racial/ethnic identities were excluded from analyses stratified by race/ethnicity due to small sample size

<sup>b</sup>Adjusted for birth cohort and childhood family income

<sup>c</sup>Referent group is thelarche at age 11-13 years

<sup>d</sup>P for heterogeneity calculated from a likelihood ratio test of nested models
