# Supplementary material for: Early-life exposures and age at thelarche in the Sister Study cohort
Source: Springer Nature journal article supplement (doi:10.1186/s13058-021-01490-z), 2021-12-11
Supplement: MOESM8 [file 19950916]

**Table S5.** Associations between early-life exposures and timing of thelarche in the Sister Study cohort by qualitative childhood family income (N=49,162)

|                                           | Well off<br>(n=3137)                |            |                                    |            | Middle income<br>(n=29,359)         |            |                                    |            | Low income<br>(n=12,763)            |            |                                    |            | Poor<br>(n=3903)                    |            |                                    |            | p-<br>het <sup>c</sup> |
|-------------------------------------------|-------------------------------------|------------|------------------------------------|------------|-------------------------------------|------------|------------------------------------|------------|-------------------------------------|------------|------------------------------------|------------|-------------------------------------|------------|------------------------------------|------------|------------------------|
|                                           | Early<br>(≤10 years) <sup>a,b</sup> |            | Late<br>(≥14 years) <sup>a,b</sup> |            | Early<br>(≤10 years) <sup>a,b</sup> |            | Late<br>(≥14 years) <sup>a,b</sup> |            | Early<br>(≤10 years) <sup>a,b</sup> |            | Late<br>(≥14 years) <sup>a,b</sup> |            | Early<br>(≤10 years) <sup>a,b</sup> |            | Late<br>(≥14 years) <sup>a,b</sup> |            |                        |
|                                           | OR                                  | 95% CI     | OR                                 | 95% CI     | OR                                  | 95% CI     | OR                                 | 95% CI     | OR                                  | 95% CI     | OR                                 | 95% CI     | OR                                  | 95% CI     | OR                                 | 95% CI     |                        |
| <i>Maternal pregnancy characteristics</i> |                                     |            |                                    |            |                                     |            |                                    |            |                                     |            |                                    |            |                                     |            |                                    |            |                        |
| Diabetes                                  |                                     |            |                                    |            |                                     |            |                                    |            |                                     |            |                                    |            |                                     |            |                                    |            | 0.25                   |
| Any                                       | 0.88                                | 0.30, 2.64 | 1.03                               | 0.71, 1.49 | 1.03                                | 0.71, 1.49 | 0.66                               | 0.44, 0.99 | 1.48                                | 0.96, 2.28 | 1.38                               | 0.93, 2.06 | 1.33                                | 0.67, 2.66 | 0.95                               | 0.47, 1.94 |                        |
| None                                      | 1                                   | Ref        | 1                                  | Ref        | 1                                   | Ref        | 1                                  | Ref        | 1                                   | Ref        | 1                                  | Ref        | 1                                   | Ref        | 1                                  | Ref        |                        |
| Gestational hypertensive disorder         |                                     |            |                                    |            |                                     |            |                                    |            |                                     |            |                                    |            |                                     |            |                                    |            | 0.12                   |
| Any                                       | 0.71                                | 0.36, 1.41 | 1.26                               | 1.05, 1.50 | 1.26                                | 1.05, 1.50 | 0.90                               | 0.75, 1.08 | 1.30                                | 1.00, 1.70 | 1.25                               | 0.98, 1.58 | 1.42                                | 0.95, 2.11 | 0.83                               | 0.54, 1.28 |                        |
| None                                      | 1                                   | Ref        | 1                                  | Ref        | 1                                   | Ref        | 1                                  | Ref        | 1                                   | Ref        | 1                                  | Ref        | 1                                   | Ref        | 1                                  | Ref        |                        |
| DES use                                   |                                     |            |                                    |            |                                     |            |                                    |            |                                     |            |                                    |            |                                     |            |                                    |            | 0.23                   |
| Yes                                       | 0.63                                | 0.31, 1.28 | 1.37                               | 1.12, 1.67 | 1.37                                | 1.12, 1.67 | 1.13                               | 0.93, 1.37 | 1.06                                | 0.71, 1.59 | 0.91                               | 0.62, 1.32 | 1.19                                | 0.65, 2.19 | 0.72                               | 0.36, 1.44 |                        |
| No                                        | 1                                   | Ref        | 1                                  | Ref        | 1                                   | Ref        | 1                                  | Ref        | 1                                   | Ref        | 1                                  | Ref        | 1                                   | Ref        | 1                                  | Ref        |                        |
| Smoking during pregnancy                  |                                     |            |                                    |            |                                     |            |                                    |            |                                     |            |                                    |            |                                     |            |                                    |            | 0.55                   |
| Yes                                       | 1.26                                | 1.02, 1.56 | 1.20                               | 1.11, 1.29 | 1.20                                | 1.11, 1.29 | 1.00                               | 0.93, 1.07 | 1.17                                | 1.04, 1.31 | 1.11                               | 1.00, 1.23 | 1.31                                | 1.06, 1.61 | 1.09                               | 0.90, 1.32 |                        |
| No                                        | 1                                   | Ref        | 1                                  | Ref        | 1                                   | Ref        | 1                                  | Ref        | 1                                   | Ref        | 1                                  | Ref        | 1                                   | Ref        | 1                                  | Ref        |                        |
| Farm exposure                             |                                     |            |                                    |            |                                     |            |                                    |            |                                     |            |                                    |            |                                     |            |                                    |            | 0.60                   |
| Work and residence                        | 0.90                                | 0.51, 1.60 | 0.94                               | 0.82, 1.08 | 0.94                                | 0.82, 1.08 | 0.96                               | 0.85, 1.09 | 1.09                                | 0.95, 1.25 | 0.91                               | 0.80, 1.03 | 0.93                                | 0.75, 1.15 | 0.93                               | 0.77, 1.12 |                        |
| Work only                                 | 0.78                                | 0.23, 2.65 | 1.31                               | 0.95, 1.79 | 1.31                                | 0.95, 1.79 | 1.30                               | 0.98, 1.74 | 0.92                                | 0.60, 1.41 | 1.14                               | 0.81, 1.61 | 0.72                                | 0.37, 1.43 | 1.05                               | 0.62, 1.79 |                        |
| Residence only                            | 0.42                                | 0.20, 0.89 | 1.05                               | 0.88, 1.26 | 1.05                                | 0.88, 1.26 | 0.87                               | 0.73, 1.04 | 0.99                                | 0.78, 1.26 | 0.91                               | 0.73, 1.13 | 0.88                                | 0.58, 1.34 | 0.79                               | 0.54, 1.17 |                        |
| None                                      | 1                                   | Ref        | 1                                  | Ref        | 1                                   | Ref        | 1                                  | Ref        | 1                                   | Ref        | 1                                  | Ref        | 1                                   | Ref        | 1                                  | Ref        |                        |
| Age at delivery                           |                                     |            |                                    |            |                                     |            |                                    |            |                                     |            |                                    |            |                                     |            |                                    |            | 0.59                   |
| <20 years                                 | 2.59                                | 1.29, 5.22 | 1.21                               | 1.02, 1.44 | 1.21                                | 1.02, 1.44 | 0.85                               | 0.72, 1.02 | 1.30                                | 1.05, 1.61 | 1.03                               | 0.84, 1.26 | 1.60                                | 1.13, 2.26 | 0.87                               | 0.62, 1.22 |                        |
| 20-24 years                               | 0.90                                | 0.67, 1.22 | 1.09                               | 1.00, 1.20 | 1.09                                | 1.00, 1.20 | 0.97                               | 0.89, 1.06 | 1.06                                | 0.92, 1.23 | 0.97                               | 0.86, 1.10 | 1.26                                | 0.96, 1.63 | 0.93                               | 0.74, 1.17 |                        |
| 25-29 years                               | 1                                   | Ref        | 1                                  | Ref        | 1                                   | Ref        | 1                                  | Ref        | 1                                   | Ref        | 1                                  | Ref        | 1                                   | Ref        | 1                                  | Ref        |                        |
| 30-34 years                               | 0.92                                | 0.71, 1.21 | 0.95                               | 0.86, 1.04 | 0.95                                | 0.86, 1.04 | 0.94                               | 0.86, 1.04 | 0.92                                | 0.79, 1.07 | 0.96                               | 0.84, 1.09 | 1.08                                | 0.82, 1.42 | 1.01                               | 0.80, 1.27 |                        |
| 35-39 years                               | 0.80                                | 0.57, 1.11 | 1.03                               | 0.92, 1.16 | 1.03                                | 0.92, 1.16 | 0.96                               | 0.86, 1.07 | 0.99                                | 0.83, 1.18 | 0.99                               | 0.85, 1.16 | 0.86                                | 0.63, 1.17 | 0.72                               | 0.55, 0.95 |                        |
| ≥40 years                                 | 0.83                                | 0.49, 1.42 | 0.90                               | 0.74, 1.08 | 0.90                                | 0.74, 1.08 | 1.08                               | 0.93, 1.26 | 1.07                                | 0.85, 1.34 | 0.9                                | 0.73, 1.12 | 0.93                                | 0.62, 1.40 | 0.91                               | 0.64, 1.29 |                        |
| <i>Birth and infancy characteristics</i>  |                                     |            |                                    |            |                                     |            |                                    |            |                                     |            |                                    |            |                                     |            |                                    |            |                        |
| Firstborn                                 |                                     |            |                                    |            |                                     |            |                                    |            |                                     |            |                                    |            |                                     |            |                                    |            | 0.59                   |
| Yes                                       | 1.07                                | 0.83, 1.37 | 1.23                               | 1.14, 1.33 | 1.23                                | 1.14, 1.33 | 0.84                               | 0.78, 0.90 | 1.29                                | 1.14, 1.47 | 0.87                               | 0.77, 0.98 | 1.50                                | 1.18, 1.90 | 0.83                               | 0.66, 1.06 |                        |

|                                   |      |            |      |            |      |            |      |            |      |            |      |            |      |            |      |            |      |
|-----------------------------------|------|------------|------|------------|------|------------|------|------------|------|------------|------|------------|------|------------|------|------------|------|
| No                                | 1    | Ref        | 1    | Ref        | 1    | Ref        | 1    | Ref        | 1    | Ref        | 1    | Ref        | 1    | Ref        | 1    | Ref        |      |
| Birthweight                       |      |            |      |            |      |            |      |            |      |            |      |            |      |            |      |            | 0.27 |
| <2500g                            | 0.86 | 0.59, 1.27 | 1.07 | 0.94, 1.22 | 1.07 | 0.94, 1.22 | 1.10 | 0.98, 1.24 | 1.10 | 0.91, 1.34 | 1.25 | 1.05, 1.49 | 0.98 | 0.68, 1.41 | 1.44 | 1.07, 1.92 |      |
| 2500g-3999g                       | 1    | Ref        | 1    | Ref        | 1    | Ref        | 1    | Ref        | 1    | Ref        | 1    | Ref        | 1    | Ref        | 1    | Ref        |      |
| ≥4000g                            | 0.91 | 0.58, 1.42 | 0.96 | 0.83, 1.11 | 0.96 | 0.83, 1.11 | 0.93 | 0.82, 1.07 | 1.04 | 0.85, 1.27 | 1.10 | 0.92, 1.31 | 1.20 | 0.85, 1.69 | 0.89 | 0.64, 1.24 |      |
| Multiple birth                    |      |            |      |            |      |            |      |            |      |            |      |            |      |            |      |            | 0.04 |
| Yes                               | 0.41 | 0.19, 0.90 | 0.90 | 0.73, 1.11 | 0.90 | 0.73, 1.11 | 1.19 | 1.00, 1.41 | 0.90 | 0.67, 1.21 | 1.04 | 0.81, 1.33 | 1.01 | 0.59, 1.72 | 1.44 | 0.96, 2.17 |      |
| No                                | 1    | Ref        | 1    | Ref        | 1    | Ref        | 1    | Ref        | 1    | Ref        | 1    | Ref        | 1    | Ref        | 1    | Ref        |      |
| Gestational age at birth          |      |            |      |            |      |            |      |            |      |            |      |            |      |            |      |            | 0.27 |
| Born ≥1 month before due date     | 0.54 | 0.21, 1.38 | 1.02 | 0.81, 1.29 | 1.02 | 0.81, 1.29 | 1.22 | 0.99, 1.49 | 0.86 | 0.56, 1.32 | 1.2  | 0.85, 1.69 | 0.54 | 0.24, 1.21 | 0.68 | 0.34, 1.37 |      |
| Born 2-4 weeks before due date    | 1.06 | 0.64, 1.76 | 1.02 | 0.86, 1.21 | 1.02 | 0.86, 1.21 | 0.89 | 0.75, 1.05 | 1.27 | 0.97, 1.67 | 0.90 | 0.68, 1.20 | 0.65 | 0.31, 1.35 | 1.44 | 0.86, 2.43 |      |
| Not born ≥2 weeks before due date | 1    | Ref        | 1    | Ref        | 1    | Ref        | 1    | Ref        | 1    | Ref        | 1    | Ref        | 1    | Ref        | 1    | Ref        |      |
| Ever breastfed                    |      |            |      |            |      |            |      |            |      |            |      |            |      |            |      |            | 0.34 |
| Yes                               | 1.11 | 0.89, 1.38 | 0.99 | 0.92, 1.07 | 0.99 | 0.92, 1.07 | 0.98 | 0.92, 1.05 | 0.95 | 0.84, 1.06 | 0.91 | 0.82, 1.01 | 0.97 | 0.78, 1.19 | 0.86 | 0.72, 1.04 |      |
| No                                | 1    | Ref        | 1    | Ref        | 1    | Ref        | 1    | Ref        | 1    | Ref        | 1    | Ref        | 1    | Ref        | 1    | Ref        |      |
| Ever fed soy formula              |      |            |      |            |      |            |      |            |      |            |      |            |      |            |      |            | 0.02 |
| Yes                               | 0.65 | 0.33, 1.28 | 1.17 | 0.95, 1.44 | 1.17 | 0.95, 1.44 | 1.27 | 1.05, 1.52 | 0.93 | 0.64, 1.34 | 0.82 | 0.58, 1.17 | 1.70 | 1.00, 2.90 | 0.88 | 0.47, 1.63 |      |
| No                                | 1    | Ref        | 1    | Ref        | 1    | Ref        | 1    | Ref        | 1    | Ref        | 1    | Ref        | 1    | Ref        | 1    | Ref        |      |

<sup>a</sup>Adjusted for birth cohort and race/ethnicity

<sup>b</sup>Referent group is thelarche at age 11-13 years

<sup>c</sup>P for heterogeneity calculated from a likelihood ratio test of nested models
