# Supplementary material for: Early-life exposures and age at thelarche in the Sister Study cohort
Source: Springer Nature journal article supplement (doi:10.1186/s13058-021-01490-z), 2021-12-11
Supplement: MOESM9 [file 19950916]

**Table S6.** Associations between early-life exposures and timing of thelarche in the Sister Study cohort by Bayesian family history score (BFHS) (N=49,151)

|                                           | BFHS<median <sup>a</sup><br>(n=24,233) |            |                                 |            | BFHS≥median <sup>a</sup><br>(n=24,918) |            |                                 |            | P-het for<br>median<br>BFHS <sup>d</sup> | P-het for<br>continuous<br>BFHS <sup>e</sup> |
|-------------------------------------------|----------------------------------------|------------|---------------------------------|------------|----------------------------------------|------------|---------------------------------|------------|------------------------------------------|----------------------------------------------|
|                                           | Early (≤10 years) <sup>b,c</sup>       |            | Late (≥14 years) <sup>b,c</sup> |            | Early (≤10 years) <sup>b,c</sup>       |            | Late (≥14 years) <sup>b,c</sup> |            |                                          |                                              |
|                                           | OR                                     | 95% CI     | OR                              | 95% CI     | OR                                     | 95% CI     | OR                              | 95% CI     |                                          |                                              |
| <i>Maternal pregnancy characteristics</i> |                                        |            |                                 |            |                                        |            |                                 |            |                                          |                                              |
| Diabetes                                  |                                        |            |                                 |            |                                        |            |                                 |            | 0.18                                     | 0.21                                         |
| Any                                       | 1.49                                   | 1.06, 2.10 | 0.88                            | 0.61, 1.28 | 0.95                                   | 0.65, 1.38 | 0.94                            | 0.66, 1.33 |                                          |                                              |
| None                                      | 1                                      | Ref        | 1                               | Ref        | 1                                      | Ref        | 1                               | Ref        |                                          |                                              |
| Gestational hypertensive disorder         |                                        |            |                                 |            |                                        |            |                                 |            | 0.22                                     | 0.68                                         |
| Any                                       | 1.10                                   | 0.90, 1.35 | 0.95                            | 0.78, 1.15 | 1.40                                   | 1.17, 1.68 | 0.98                            | 0.81, 1.18 |                                          |                                              |
| None                                      | 1                                      | Ref        | 1                               | Ref        | 1                                      | Ref        | 1                               | Ref        |                                          |                                              |
| DES use                                   |                                        |            |                                 |            |                                        |            |                                 |            | 0.58                                     | 0.59                                         |
| Yes                                       | 1.31                                   | 1.01, 1.70 | 0.95                            | 0.73, 1.23 | 1.17                                   | 0.94, 1.45 | 1.06                            | 0.86, 1.30 |                                          |                                              |
| No                                        | 1                                      | Ref        | 1                               | Ref        | 1                                      | Ref        | 1                               | Ref        |                                          |                                              |
| Smoking during pregnancy                  |                                        |            |                                 |            |                                        |            |                                 |            | 0.73                                     | 0.11                                         |
| Yes                                       | 1.22                                   | 1.12, 1.33 | 1.04                            | 0.96, 1.13 | 1.18                                   | 1.09, 1.27 | 1.01                            | 0.94, 1.08 |                                          |                                              |
| No                                        | 1                                      | Ref        | 1                               | Ref        | 1                                      | Ref        | 1                               | Ref        |                                          |                                              |
| Farm exposure                             |                                        |            |                                 |            |                                        |            |                                 |            | 0.16                                     | 0.40                                         |
| Work and residence                        | 1.02                                   | 0.91, 1.14 | 1.04                            | 0.94, 1.15 | 0.99                                   | 0.87, 1.13 | 0.83                            | 0.73, 0.94 |                                          |                                              |
| Work only                                 | 0.93                                   | 0.66, 1.32 | 1.20                            | 0.91, 1.59 | 1.18                                   | 0.86, 1.61 | 1.22                            | 0.91, 1.62 |                                          |                                              |
| Residence only                            | 0.94                                   | 0.78, 1.14 | 0.86                            | 0.72, 1.02 | 1.02                                   | 0.84, 1.24 | 0.87                            | 0.72, 1.04 |                                          |                                              |
| None                                      | 1                                      | Ref        | 1                               | Ref        | 1                                      | Ref        | 1                               | Ref        |                                          |                                              |
| Age at delivery                           |                                        |            |                                 |            |                                        |            |                                 |            | 0.17                                     | 0.84                                         |
| <20 years                                 | 1.37                                   | 1.14, 1.64 | 0.94                            | 0.78, 1.12 | 1.24                                   | 1.05, 1.46 | 0.92                            | 0.78, 1.08 |                                          |                                              |
| 20-24 years                               | 1.01                                   | 0.91, 1.13 | 1.01                            | 0.91, 1.11 | 1.13                                   | 1.03, 1.25 | 0.94                            | 0.86, 1.02 |                                          |                                              |
| 25-29 years                               | 1                                      | Ref        | 1                               | Ref        | 1                                      | Ref        | 1                               | Ref        |                                          |                                              |
| 30-34 years                               | 0.91                                   | 0.82, 1.01 | 0.98                            | 0.89, 1.07 | 1.00                                   | 0.90, 1.11 | 0.94                            | 0.85, 1.03 |                                          |                                              |
| 35-39 years                               | 0.99                                   | 0.88, 1.12 | 1.01                            | 0.91, 1.13 | 0.98                                   | 0.86, 1.12 | 0.88                            | 0.78, 0.99 |                                          |                                              |
| ≥40 years                                 | 0.83                                   | 0.69, 0.99 | 1.01                            | 0.87, 1.18 | 1.14                                   | 0.94, 1.39 | 1.03                            | 0.86, 1.22 |                                          |                                              |
| <i>Birth and infancy characteristics</i>  |                                        |            |                                 |            |                                        |            |                                 |            |                                          |                                              |
| Firstborn                                 |                                        |            |                                 |            |                                        |            |                                 |            | 0.26                                     | 0.81                                         |
| Yes                                       | 1.23                                   | 1.12, 1.35 | 0.79                            | 0.72, 0.86 | 1.24                                   | 1.14, 1.35 | 0.87                            | 0.80, 0.95 |                                          |                                              |

|                                   |      |            |      |            |      |            |      |            |      |      |
|-----------------------------------|------|------------|------|------------|------|------------|------|------------|------|------|
| No                                | 1    | Ref        | 1    | Ref        | 1    | Ref        | 1    | Ref        |      |      |
| Birthweight                       |      |            |      |            |      |            |      |            | 0.79 | 0.36 |
| <2500g                            | 1.07 | 0.93, 1.24 | 1.19 | 1.05, 1.36 | 1.05 | 0.91, 1.20 | 1.10 | 0.97, 1.25 |      |      |
| 2500g-3999g                       | 1    | Ref        | 1    | Ref        | 1    | Ref        | 1    | Ref        |      |      |
| ≥4000g                            | 1.02 | 0.88, 1.19 | 1.05 | 0.91, 1.20 | 0.99 | 0.85, 1.15 | 0.94 | 0.82, 1.08 |      |      |
| Multiple birth                    |      |            |      |            |      |            |      |            | 0.12 | 0.11 |
| Yes                               | 0.79 | 0.62, 1.00 | 0.98 | 0.81, 1.18 | 0.96 | 0.77, 1.19 | 1.26 | 1.05, 1.51 |      |      |
| No                                | 1    | Ref        | 1    | Ref        | 1    | Ref        | 1    | Ref        |      |      |
| Gestational age at birth          |      |            |      |            |      |            |      |            | 0.10 | 0.03 |
| Born ≥1 month before due date     | 0.91 | 0.68, 1.21 | 1.38 | 1.10, 1.74 | 0.92 | 0.71, 1.19 | 0.98 | 0.77, 1.24 |      |      |
| Born 2-4 weeks before due date    | 1.09 | 0.88, 1.34 | 0.81 | 0.66, 1.01 | 1.04 | 0.87, 1.24 | 1.01 | 0.86, 1.19 |      |      |
| Not born ≥2 weeks before due date | 1    | Ref        | 1    | Ref        | 1    | Ref        | 1    | Ref        |      |      |
| Ever breastfed                    |      |            |      |            |      |            |      |            | 0.78 | 0.97 |
| Yes                               | 0.99 | 0.91, 1.08 | 0.93 | 0.86, 1.00 | 0.98 | 0.91, 1.06 | 0.96 | 0.89, 1.03 |      |      |
| No                                | 1    | Ref        | 1    | Ref        | 1    | Ref        | 1    | Ref        |      |      |
| Ever fed soy formula              |      |            |      |            |      |            |      |            | 0.76 | 0.60 |
| Yes                               | 1.03 | 0.78, 1.35 | 1.00 | 0.78, 1.30 | 1.13 | 0.92, 1.39 | 1.11 | 0.91, 1.34 |      |      |
| No                                | 1    | Ref        | 1    | Ref        | 1    | Ref        | 1    | Ref        |      |      |

<sup>a</sup>Median BFHS in analytic sample is 0.306425. Median BFHS is weighted to control for length-biased sampling in calculation of BFHS. N=11 women are excluded due to missing weight.

<sup>b</sup>Adjusted for birth cohort, race/ethnicity and childhood family income

<sup>c</sup>Referent group is thelarche at age 11-13 years

<sup>d</sup>P for heterogeneity calculated from a likelihood ratio test of nested models

<sup>e</sup>Model to generate p-het for continuous BFHS was weighted to control for length-biased sampling in calculation of BFHS. N=11 women are excluded due to missing weight. P-value for heterogeneity calculated from a joint Wald test of exposure\*BFHS interaction terms.
