# Supplementary material for: Early-life exposures and age at thelarche in the Sister Study cohort
Source: Springer Nature journal article supplement (doi:10.1186/s13058-021-01490-z), 2021-12-11
Supplement: MOESM10 [file 19950916]

**Table S7.** Associations between early-life exposures and age at thelarche using alternate characterizations of age at thelarche in the Sister Study cohort (N=49,162)

|                                           | Age at thelarche <sup>a,b</sup> |            |      |            |      |            |                   |            |      |            |      |            | Continuous age at thelarche (years) <sup>b,c</sup> |              |
|-------------------------------------------|---------------------------------|------------|------|------------|------|------------|-------------------|------------|------|------------|------|------------|----------------------------------------------------|--------------|
|                                           | Earlier development             |            |      |            |      |            | Later development |            |      |            |      |            |                                                    |              |
|                                           | ≤9                              |            | 10   |            | 11   |            | 13                |            | 14   |            | ≥15  |            | β                                                  | 95% CI       |
|                                           | OR                              | 95% CI     | OR   | 95% CI     | OR   | 95% CI     | OR                | 95% CI     | OR   | 95% CI     | OR   | 95% CI     |                                                    |              |
| <i>Maternal pregnancy characteristics</i> |                                 |            |      |            |      |            |                   |            |      |            |      |            |                                                    |              |
| <b>Diabetes</b>                           |                                 |            |      |            |      |            |                   |            |      |            |      |            |                                                    |              |
| Any                                       | 1.40                            | 0.92, 2.12 | 1.04 | 0.75, 1.44 | 1.04 | 0.79, 1.37 | 0.83              | 0.63, 1.09 | 1.01 | 0.73, 1.40 | 0.69 | 0.45, 1.05 | -0.19                                              | -0.33, -0.04 |
| <i>Gestational diabetes</i>               | 0.65                            | 0.28, 1.49 | 0.77 | 0.46, 1.28 | 1.06 | 0.73, 1.53 | 0.72              | 0.48, 1.07 | 1.05 | 0.67, 1.65 | 0.48 | 0.24, 0.96 | -0.10                                              | -0.31, 0.11  |
| <i>Pre-pregnancy diabetes</i>             | 2.27                            | 1.37, 3.75 | 1.36 | 0.88, 2.11 | 0.94 | 0.62, 1.42 | 0.88              | 0.59, 1.30 | 0.82 | 0.49, 1.39 | 0.85 | 0.48, 1.49 | -0.35                                              | -0.56, -0.14 |
| None                                      | 1                               | Ref        | 1    | Ref        | 1    | Ref        | 1                 | Ref        | 1    | Ref        | 1    | Ref        | 0                                                  | Ref          |
| <b>Gestational hypertensive disorder</b>  |                                 |            |      |            |      |            |                   |            |      |            |      |            |                                                    |              |
| Any                                       | 1.44                            | 1.13, 1.83 | 1.28 | 1.08, 1.51 | 1.23 | 1.07, 1.42 | 0.99              | 0.86, 1.15 | 0.93 | 0.77, 1.13 | 1.12 | 0.92, 1.37 | -0.13                                              | -0.21, -0.05 |
| <i>Pre-eclampsia</i>                      | 1.64                            | 1.19, 2.27 | 1.36 | 1.08, 1.71 | 1.21 | 0.99, 1.48 | 1.11              | 0.92, 1.35 | 1.07 | 0.83, 1.38 | 1.09 | 0.83, 1.45 | -0.13                                              | -0.23, -0.02 |
| <i>Gestational hypertension</i>           | 1.07                            | 0.71, 1.61 | 1.16 | 0.88, 1.52 | 1.20 | 0.96, 1.51 | 0.86              | 0.68, 1.09 | 0.70 | 0.50, 0.97 | 0.95 | 0.69, 1.32 | -0.18                                              | -0.30, -0.05 |
| None                                      | 1                               | Ref        | 1    | Ref        | 1    | Ref        | 1                 | Ref        | 1    | Ref        | 1    | Ref        | 0                                                  | Ref          |
| <b>DES use</b>                            |                                 |            |      |            |      |            |                   |            |      |            |      |            |                                                    |              |
| Yes                                       | 1.05                            | 0.75, 1.47 | 1.28 | 1.05, 1.56 | 0.91 | 0.76, 1.10 | 1.06              | 0.89, 1.25 | 0.96 | 0.77, 1.20 | 1.08 | 0.85, 1.37 | -0.02                                              | -0.11, 0.07  |
| No                                        | 1                               | Ref        | 1    | Ref        | 1    | Ref        | 1                 | Ref        | 1    | Ref        | 1    | Ref        | 0                                                  | Ref          |
| <b>Smoking during pregnancy</b>           |                                 |            |      |            |      |            |                   |            |      |            |      |            |                                                    |              |
| Yes                                       | 1.21                            | 1.08, 1.35 | 1.20 | 1.12, 1.29 | 1.06 | 1.00, 1.13 | 0.96              | 0.91, 1.01 | 0.98 | 0.91, 1.05 | 1.09 | 1.00, 1.18 | -0.06                                              | -0.09, -0.03 |
| No                                        | 1                               | Ref        | 1    | Ref        | 1    | Ref        | 1                 | Ref        | 1    | Ref        | 1    | Ref        | 0                                                  | Ref          |
| <b>Farm exposure</b>                      |                                 |            |      |            |      |            |                   |            |      |            |      |            |                                                    |              |
| Work and residence                        | 1.12                            | 0.95, 1.31 | 0.99 | 0.89, 1.10 | 1.01 | 0.92, 1.10 | 1.07              | 0.98, 1.16 | 0.99 | 0.89, 1.10 | 0.93 | 0.82, 1.05 | -0.02                                              | -0.07, 0.03  |
| Work only                                 | 0.91                            | 0.56, 1.46 | 1.23 | 0.93, 1.63 | 1.12 | 0.88, 1.43 | 1.17              | 0.93, 1.47 | 1.32 | 1.00, 1.75 | 1.28 | 0.94, 1.75 | 0.09                                               | -0.04, 0.21  |
| Residence only                            | 1.19                            | 0.94, 1.51 | 0.89 | 0.75, 1.05 | 0.96 | 0.84, 1.09 | 0.99              | 0.87, 1.12 | 0.85 | 0.71, 1.00 | 0.85 | 0.70, 1.03 | -0.07                                              | -0.14, 0.01  |
| None                                      | 1                               | Ref        | 1    | Ref        | 1    | Ref        | 1                 | Ref        | 1    | Ref        | 1    | Ref        | 0                                                  | Ref          |
| <b>Age at delivery</b>                    |                                 |            |      |            |      |            |                   |            |      |            |      |            |                                                    |              |
| <20 years                                 | 1.38                            | 1.10, 1.72 | 1.29 | 1.11, 1.51 | 1.09 | 0.96, 1.25 | 0.95              | 0.84, 1.08 | 0.90 | 0.76, 1.06 | 0.99 | 0.82, 1.18 | -0.15                                              | -0.22, -0.08 |
| 20-24 years                               | 1.13                            | 0.98, 1.30 | 1.05 | 0.96, 1.15 | 0.98 | 0.91, 1.06 | 0.96              | 0.90, 1.03 | 0.91 | 0.83, 0.99 | 1.02 | 0.92, 1.13 | -0.04                                              | -0.08, 0.00  |
| 25-29 years                               | 1                               | Ref        | 1    | Ref        | 1    | Ref        | 1                 | Ref        | 1    | Ref        | 1    | Ref        | 0                                                  | Ref          |
| 30-34 years                               | 0.94                            | 0.81, 1.09 | 0.97 | 0.89, 1.06 | 1.01 | 0.94, 1.08 | 1.04              | 0.97, 1.12 | 0.98 | 0.89, 1.07 | 0.94 | 0.85, 1.05 | 0.00                                               | -0.04, 0.04  |

|                                          |      |            |      |            |      |            |      |            |      |            |      |            |       |              |
|------------------------------------------|------|------------|------|------------|------|------------|------|------------|------|------------|------|------------|-------|--------------|
| 35-39 years                              | 0.97 | 0.82, 1.14 | 0.96 | 0.87, 1.07 | 0.97 | 0.89, 1.06 | 0.95 | 0.88, 1.03 | 0.92 | 0.83, 1.02 | 0.92 | 0.82, 1.04 | -0.03 | -0.07, 0.02  |
| ≥40 years                                | 1.06 | 0.84, 1.35 | 0.91 | 0.77, 1.07 | 0.96 | 0.84, 1.09 | 1.04 | 0.92, 1.17 | 1.02 | 0.87, 1.19 | 0.97 | 0.82, 1.16 | 0.02  | -0.05, 0.09  |
| <i>Birth and infancy characteristics</i> |      |            |      |            |      |            |      |            |      |            |      |            |       |              |
| <b>Firstborn</b>                         |      |            |      |            |      |            |      |            |      |            |      |            |       |              |
| Yes                                      | 1.39 | 1.24, 1.57 | 1.20 | 1.11, 1.30 | 1.13 | 1.06, 1.20 | 0.90 | 0.84, 0.95 | 0.84 | 0.77, 0.91 | 0.83 | 0.76, 0.91 | -0.20 | -0.23, -0.16 |
| No                                       | 1    | Ref        | 1    | Ref        | 1    | Ref        | 1    | Ref        | 1    | Ref        | 1    | Ref        | 0     | Ref          |
| <b>Birthweight</b>                       |      |            |      |            |      |            |      |            |      |            |      |            |       |              |
| <2500g                                   | 1.20 | 1.00, 1.43 | 1.00 | 0.88, 1.13 | 0.98 | 0.88, 1.08 | 0.99 | 0.90, 1.10 | 1.05 | 0.93, 1.19 | 1.25 | 1.10, 1.43 | 0.05  | 0.00, 0.11   |
| 2500g-3999g                              | 1    | Ref        | 1    | Ref        | 1    | Ref        | 1    | Ref        | 1    | Ref        | 1    | Ref        | 0     | Ref          |
| ≥4000g                                   | 1.16 | 0.96, 1.41 | 0.96 | 0.84, 1.10 | 1.01 | 0.91, 1.12 | 1.03 | 0.93, 1.13 | 0.95 | 0.83, 1.08 | 1.08 | 0.93, 1.25 | 0.00  | -0.06, 0.06  |
| <b>Multiple birth</b>                    |      |            |      |            |      |            |      |            |      |            |      |            |       |              |
| Yes                                      | 0.62 | 0.44, 0.88 | 0.91 | 0.75, 1.10 | 0.93 | 0.80, 1.08 | 0.92 | 0.79, 1.06 | 1.06 | 0.88, 1.26 | 1.08 | 0.88, 1.31 | 0.10  | 0.02, 0.18   |
| No                                       | 1    | Ref        | 1    | Ref        | 1    | Ref        | 1    | Ref        | 1    | Ref        | 1    | Ref        | 0     | Ref          |
| <b>Gestational age at birth</b>          |      |            |      |            |      |            |      |            |      |            |      |            |       |              |
| Born ≥1 month before due date            | 0.96 | 0.68, 1.38 | 0.92 | 0.72, 1.17 | 0.99 | 0.81, 1.20 | 1.09 | 0.91, 1.30 | 1.06 | 0.84, 1.34 | 1.36 | 1.07, 1.74 | 0.14  | 0.04, 0.24   |
| Born 2-4 weeks before due date           | 0.87 | 0.65, 1.14 | 1.16 | 0.99, 1.37 | 0.97 | 0.84, 1.11 | 1.11 | 0.97, 1.26 | 0.90 | 0.75, 1.08 | 1.01 | 0.83, 1.24 | 0.00  | -0.08, 0.07  |
| Not born ≥2 weeks before due date        | 1    | Ref        | 1    | Ref        | 1    | Ref        | 1    | Ref        | 1    | Ref        | 1    | Ref        | 0     | Ref          |
| <b>Ever breastfed</b>                    |      |            |      |            |      |            |      |            |      |            |      |            |       |              |
| Yes                                      | 0.95 | 0.85, 1.06 | 1.01 | 0.94, 1.09 | 1.03 | 0.97, 1.09 | 1.02 | 0.96, 1.08 | 0.95 | 0.88, 1.02 | 0.97 | 0.90, 1.05 | -0.02 | -0.05, 0.01  |
| No                                       | 1    | Ref        | 1    | Ref        | 1    | Ref        | 1    | Ref        | 1    | Ref        | 1    | Ref        | 0     | Ref          |
| <b>Ever fed soy formula</b>              |      |            |      |            |      |            |      |            |      |            |      |            |       |              |
| Yes                                      | 1.32 | 0.98, 1.78 | 1.15 | 0.93, 1.42 | 1.05 | 0.88, 1.26 | 1.26 | 1.07, 1.48 | 1.06 | 0.85, 1.32 | 1.31 | 1.04, 1.64 | 0.03  | -0.06, 0.12  |
| No                                       | 1    | Ref        | 1    | Ref        | 1    | Ref        | 1    | Ref        | 1    | Ref        | 1    | Ref        | 0     | Ref          |

<sup>a</sup>Polytomous logistic regression model with referent group of thelarche at 12 years of age

<sup>b</sup>Adjusted for birth cohort, race/ethnicity and childhood family income

<sup>c</sup>Linear regression model with continuous age at thelarche as the outcome.  $\beta$  coefficient represents the difference in years in mean age at thelarche between exposed and reference group
