# Supplementary material for: Early-life exposures and age at thelarche in the Sister Study cohort
Source: Springer Nature journal article supplement (doi:10.1186/s13058-021-01490-z), 2021-12-11
Supplement: MOESM12 [file 19950916]

**Table S9.** Associations between early-life exposures and timing of menarche in the Sister Study cohort (N=49,130)<sup>a</sup>

|                                           | Early menarche<br>( $\leq 11$ years) <sup>b,c</sup> |            | Late menarche<br>( $\geq 14$ years) <sup>b,c</sup> |            |
|-------------------------------------------|-----------------------------------------------------|------------|----------------------------------------------------|------------|
|                                           | OR                                                  | 95% CI     | OR                                                 | 95% CI     |
| <i>Maternal pregnancy characteristics</i> |                                                     |            |                                                    |            |
| <b>Diabetes</b>                           |                                                     |            |                                                    |            |
| Any                                       | 1.35                                                | 1.08, 1.69 | 1.14                                               | 0.91, 1.43 |
| <i>Gestational diabetes</i>               | 1.09                                                | 0.77, 1.53 | 0.93                                               | 0.66, 1.29 |
| <i>Pre-pregnancy diabetes</i>             | 1.66                                                | 1.21, 2.28 | 1.42                                               | 1.03, 1.96 |
| None                                      | 1                                                   | Ref        | 1                                                  | Ref        |
| <b>Gestational hypertensive disorder</b>  |                                                     |            |                                                    |            |
| Any                                       | 1.27                                                | 1.13, 1.44 | 0.96                                               | 0.85, 1.09 |
| <i>Pre-eclampsia</i>                      | 1.18                                                | 1.00, 1.39 | 0.98                                               | 0.83, 1.16 |
| <i>Gestational hypertension</i>           | 1.31                                                | 1.08, 1.58 | 0.89                                               | 0.73, 1.09 |
| None                                      | 1                                                   | Ref        | 1                                                  | Ref        |
| <b>DES use</b>                            |                                                     |            |                                                    |            |
| Yes                                       | 1.21                                                | 1.05, 1.41 | 0.98                                               | 0.85, 1.14 |
| No                                        | 1                                                   | Ref        | 1                                                  | Ref        |
| <b>Smoking during pregnancy</b>           |                                                     |            |                                                    |            |
| Yes                                       | 1.14                                                | 1.08, 1.19 | 1.01                                               | 0.97, 1.06 |
| No                                        | 1                                                   | Ref        | 1                                                  | Ref        |
| <b>Farm exposure</b>                      |                                                     |            |                                                    |            |
| Work and residence                        | 1.01                                                | 0.94, 1.09 | 1                                                  | 0.93, 1.08 |
| Work only                                 | 0.89                                                | 0.72, 1.10 | 1.13                                               | 0.94, 1.36 |
| Residence only                            | 0.99                                                | 0.88, 1.11 | 1.06                                               | 0.95, 1.18 |
| None                                      | 1                                                   | Ref        | 1                                                  | Ref        |
| <b>Age at delivery</b>                    |                                                     |            |                                                    |            |
| <20 years                                 | 1.24                                                | 1.11, 1.38 | 0.90                                               | 0.81, 1.01 |
| 20-24 years                               | 1.05                                                | 0.98, 1.12 | 1.02                                               | 0.96, 1.09 |
| 25-29 years                               | 1                                                   | Ref        | 1                                                  | Ref        |
| 30-34 years                               | 1.03                                                | 0.96, 1.10 | 0.98                                               | 0.93, 1.04 |
| 35-39 years                               | 1.02                                                | 0.94, 1.10 | 0.89                                               | 0.83, 0.96 |
| $\geq 40$ years                           | 1.05                                                | 0.94, 1.17 | 0.95                                               | 0.85, 1.06 |
| <i>Birth and infancy characteristics</i>  |                                                     |            |                                                    |            |
| <b>Firstborn</b>                          |                                                     |            |                                                    |            |
| Yes                                       | 1.14                                                | 1.08, 1.20 | 0.90                                               | 0.85, 0.95 |
| No                                        | 1                                                   | Ref        | 1                                                  | Ref        |
| <b>Birthweight</b>                        |                                                     |            |                                                    |            |
| <2500g                                    | 1.15                                                | 1.05, 1.25 | 1.05                                               | 0.96, 1.14 |
| 2500g-3999g                               | 1                                                   | Ref        | 1                                                  | Ref        |

|                                   |      |            |      |            |
|-----------------------------------|------|------------|------|------------|
| ≥4000g                            | 1.08 | 0.99, 1.19 | 1.11 | 1.01, 1.21 |
| Multiple birth                    |      |            |      |            |
| Yes                               | 0.92 | 0.80, 1.05 | 1.00 | 0.89, 1.14 |
| No                                | 1    | Ref        | 1    | Ref        |
| Gestational age at birth          |      |            |      |            |
| Born ≥1 month before due date     | 1.08 | 0.92, 1.27 | 1.07 | 0.92, 1.26 |
| Born 2-4 weeks before due date    | 1.00 | 0.89, 1.13 | 0.86 | 0.77, 0.97 |
| Not born ≥2 weeks before due date | 1    | Ref        | 1    | Ref        |
| Ever breastfed                    |      |            |      |            |
| Yes                               | 0.97 | 0.92, 1.02 | 1.00 | 0.95, 1.05 |
| No                                | 1    | Ref        | 1    | Ref        |
| Ever fed soy formula              |      |            |      |            |
| Yes                               | 1.05 | 0.90, 1.23 | 1.19 | 1.04, 1.37 |
| No                                | 1    | Ref        | 1    | Ref        |

<sup>a</sup>32 women missing age at menarche were excluded from this analysis. N=10,055 women with early menarche, 27,613 women with average menarche and 11,462 women with late menarche.

<sup>b</sup>Adjusted for birth cohort, race/ethnicity and childhood family income

<sup>c</sup>Referent group is menarche at 12-13 years
