# Supplementary material for: Early-life exposures and age at thelarche in the Sister Study cohort
Source: Springer Nature journal article supplement (doi:10.1186/s13058-021-01490-z), 2021-12-11
Supplement: MOESM13 [file 19950916]

**Table S10.** Associations between early-life exposures and early thelarche ( $\leq 10$  years) and/or early menarche ( $\leq 11$  years) in the Sister Study cohort (N=49,130)<sup>a</sup>

|                                           | Early menarche without early thelarche (n=5821) <sup>b,c</sup> |            | Early thelarche without early menarche (n=2370) <sup>b,c</sup> |            | Early thelarche and early menarche (n=4234) <sup>b,c</sup> |            |
|-------------------------------------------|----------------------------------------------------------------|------------|----------------------------------------------------------------|------------|------------------------------------------------------------|------------|
|                                           | OR                                                             | 95% CI     | OR                                                             | 95% CI     | OR                                                         | 95% CI     |
| <i>Maternal pregnancy characteristics</i> |                                                                |            |                                                                |            |                                                            |            |
| <b>Diabetes</b>                           |                                                                |            |                                                                |            |                                                            |            |
| Any                                       | 1.21                                                           | 0.92, 1.60 | 1.00                                                           | 0.65, 1.53 | 1.41                                                       | 1.05, 1.89 |
| <i>Gestational diabetes</i>               | 1.17                                                           | 0.78, 1.75 | 0.61                                                           | 0.28, 1.30 | 0.98                                                       | 0.60, 1.59 |
| <i>Pre-pregnancy diabetes</i>             | 1.20                                                           | 0.81, 1.80 | 1.55                                                           | 0.92, 2.62 | 1.97                                                       | 1.36, 2.86 |
| None                                      | 1                                                              | Ref        | 1                                                              | Ref        | 1                                                          | Ref        |
| <b>Gestational hypertensive disorder</b>  |                                                                |            |                                                                |            |                                                            |            |
| Any                                       | 1.20                                                           | 1.04, 1.39 | 1.08                                                           | 0.87, 1.35 | 1.42                                                       | 1.22, 1.66 |
| <i>Pre-eclampsia</i>                      | 1.03                                                           | 0.83, 1.28 | 1.15                                                           | 0.86, 1.55 | 1.42                                                       | 1.15, 1.76 |
| <i>Gestational hypertension</i>           | 1.29                                                           | 1.02, 1.63 | 0.91                                                           | 0.62, 1.34 | 1.41                                                       | 1.09, 1.81 |
| None                                      | 1                                                              | Ref        | 1                                                              | Ref        | 1                                                          | Ref        |
| <b>DES use</b>                            |                                                                |            |                                                                |            |                                                            |            |
| Yes                                       | 1.08                                                           | 0.89, 1.30 | 0.94                                                           | 0.71, 1.26 | 1.40                                                       | 1.16, 1.69 |
| No                                        | 1                                                              | Ref        | 1                                                              | Ref        | 1                                                          | Ref        |
| <b>Smoking during pregnancy</b>           |                                                                |            |                                                                |            |                                                            |            |
| Yes                                       | 1.09                                                           | 1.03, 1.16 | 1.19                                                           | 1.09, 1.30 | 1.22                                                       | 1.14, 1.30 |
| No                                        | 1                                                              | Ref        | 1                                                              | Ref        | 1                                                          | Ref        |
| <b>Farm exposure</b>                      |                                                                |            |                                                                |            |                                                            |            |
| Work and residence                        | 1.02                                                           | 0.93, 1.11 | 1.03                                                           | 0.90, 1.19 | 1.00                                                       | 0.91, 1.11 |
| Work only                                 | 0.86                                                           | 0.66, 1.11 | 1.18                                                           | 0.84, 1.65 | 0.87                                                       | 0.65, 1.17 |
| Residence only                            | 0.95                                                           | 0.83, 1.10 | 1.02                                                           | 0.82, 1.26 | 1.00                                                       | 0.85, 1.17 |
| None                                      | 1                                                              | Ref        | 1                                                              | Ref        | 1                                                          | Ref        |
| <b>Age at delivery</b>                    |                                                                |            |                                                                |            |                                                            |            |
| <20 years                                 | 1.26                                                           | 1.11, 1.44 | 1.39                                                           | 1.15, 1.68 | 1.36                                                       | 1.18, 1.58 |
| 20-24 years                               | 1.05                                                           | 0.97, 1.13 | 1.18                                                           | 1.06, 1.33 | 1.06                                                       | 0.97, 1.16 |
| 25-29 years                               | 1                                                              | Ref        | 1                                                              | Ref        | 1                                                          | Ref        |
| 30-34 years                               | 1.04                                                           | 0.96, 1.12 | 0.88                                                           | 0.78, 0.99 | 1.01                                                       | 0.92, 1.10 |
| 35-39 years                               | 1.10                                                           | 1.00, 1.21 | 1.05                                                           | 0.91, 1.21 | 0.99                                                       | 0.89, 1.11 |
| $\geq 40$ years                           | 1.15                                                           | 1.01, 1.31 | 1.00                                                           | 0.82, 1.22 | 0.95                                                       | 0.81, 1.12 |
| <i>Birth and infancy characteristics</i>  |                                                                |            |                                                                |            |                                                            |            |
| <b>Firstborn</b>                          |                                                                |            |                                                                |            |                                                            |            |
| Yes                                       | 1.11                                                           | 1.03, 1.18 | 1.29                                                           | 1.16, 1.42 | 1.32                                                       | 1.23, 1.42 |
| No                                        | 1                                                              | Ref        | 1                                                              | Ref        | 1                                                          | Ref        |
| <b>Birthweight</b>                        |                                                                |            |                                                                |            |                                                            |            |
| <2500g                                    | 1.18                                                           | 1.06, 1.31 | 1.02                                                           | 0.87, 1.20 | 1.07                                                       | 0.95, 1.21 |
| 2500g-3999g                               | 1                                                              | Ref        | 1                                                              | Ref        | 1                                                          | Ref        |
| $\geq 4000$ g                             | 1.08                                                           | 0.97, 1.21 | 1.02                                                           | 0.87, 1.21 | 1.01                                                       | 0.89, 1.15 |
| <b>Multiple birth</b>                     |                                                                |            |                                                                |            |                                                            |            |
| Yes                                       | 0.98                                                           | 0.84, 1.15 | 0.92                                                           | 0.72, 1.18 | 0.81                                                       | 0.67, 0.99 |
| No                                        | 1                                                              | Ref        | 1                                                              | Ref        | 1                                                          | Ref        |

|                                   |      |            |      |            |      |            |
|-----------------------------------|------|------------|------|------------|------|------------|
| Gestational age at birth          |      |            |      |            |      |            |
| Born ≥1 month before due date     | 1.08 | 0.89, 1.31 | 0.71 | 0.50, 1.01 | 0.99 | 0.79, 1.24 |
| Born 2-4 weeks before due date    | 1.03 | 0.89, 1.19 | 1.09 | 0.88, 1.35 | 1.07 | 0.91, 1.27 |
| Not born ≥2 weeks before due date | 1    | Ref        | 1    | Ref        | 1    | Ref        |
| Ever breastfed                    |      |            |      |            |      |            |
| Yes                               | 0.95 | 0.89, 1.01 | 0.98 | 0.89, 1.07 | 1.00 | 0.93, 1.07 |
| No                                | 1    | Ref        | 1    | Ref        | 1    | Ref        |
| Ever fed soy formula              |      |            |      |            |      |            |
| Yes                               | 0.94 | 0.78, 1.14 | 1.06 | 0.82, 1.37 | 1.08 | 0.88, 1.32 |
| No                                | 1    | Ref        | 1    | Ref        | 1    | Ref        |

<sup>a</sup>32 women missing age at menarche were excluded from this analysis

<sup>b</sup>Adjusted for birth cohort, race/ethnicity and childhood family income

<sup>c</sup>Referent group is neither early thelarche nor early menarche (thelarche at age 11 or later and menarche at age 12 or later, n=36,705)
